# Supplementary material for: Flexing with lignin: lignin-based elastomers synthesised from untreated kraft black liquor
Source: Royal Society of Chemistry journal article supplement (doi:10.1039/d4py00490f), 2024-01-01
Supplement: d4py00490f1.pdf [file d4py00490f1.pdf]

## Supplementary information

### **Flexing with lignin: Lignin-based elastomers synthesised from untreated kraft black liquor**

Philip Verdross<sup>a</sup>, Robert T<sup>a</sup>. Woodward\*, Alexander Bismarck\*;

<sup>a</sup>Polymer and Composite Engineering (PaCE) Group, Institute of Material Chemistry and Research, Faculty of Chemistry, University of Vienna, Währinger ı Strasse, 42, 1090 Vienna, Austria

<sup>b</sup>Department of Chemical Engineering, Imperial College London, South Kensington Campus, London SW7 2AZ, United Kingdom

\*Corresponding authors: [robert.woodward@univie.ac.at](mailto:robert.woodward@univie.ac.at); [alexander.bismarck@univie.ac.at](mailto:alexander.bismarck@univie.ac.at);

Pictures of samples used for tensile testing (cyclic and non-cyclic) and material in as produced in a Teflon mold

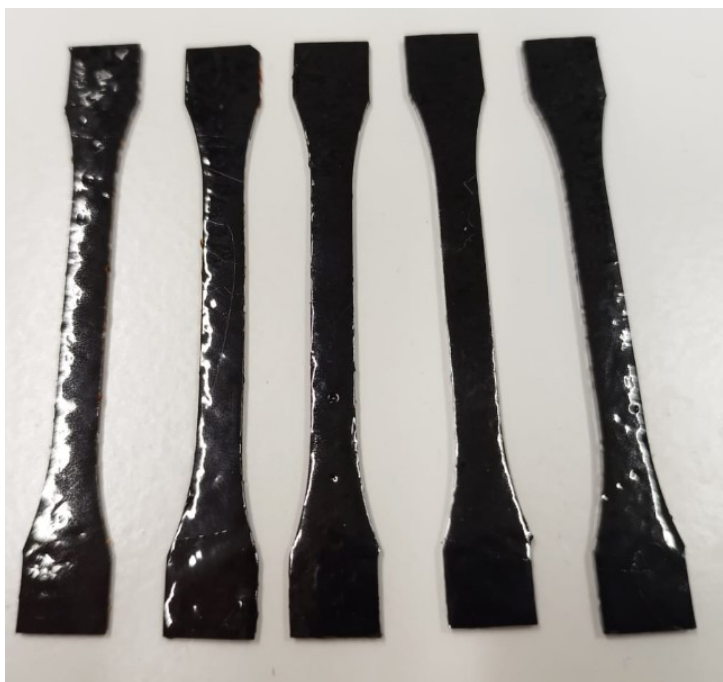

*Figure 1: Example of test specimens used for cyclic mechanical tests and tensile testing*

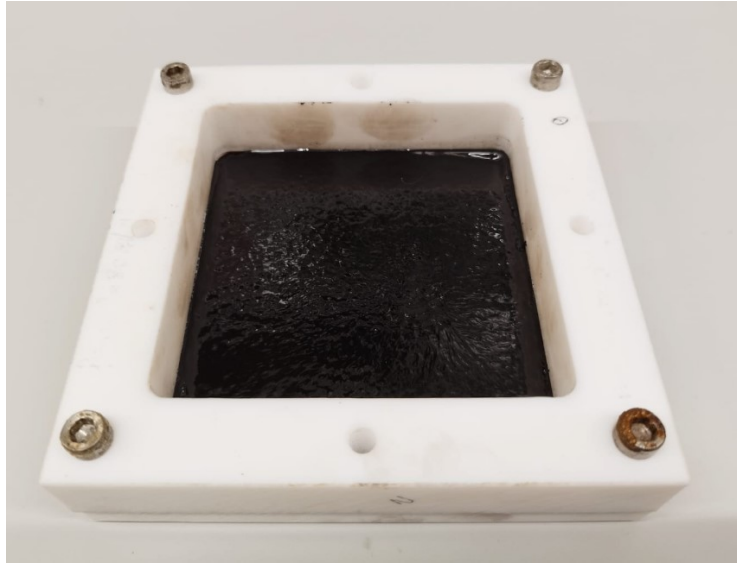

*Figure 2: Mould with polymer used to produce films from which specimens for various tests have been cut/stamped out.*

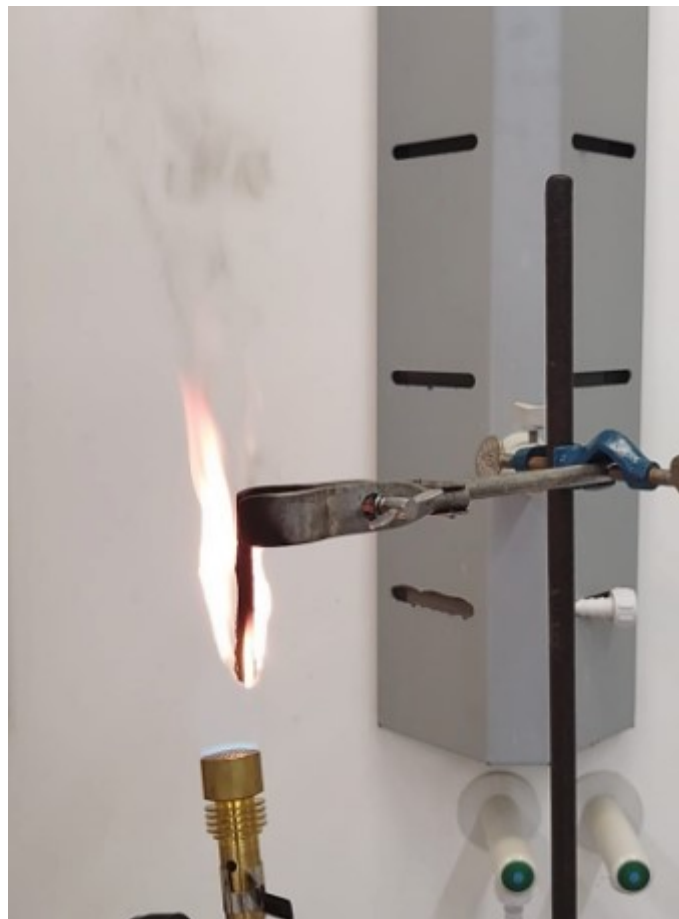

*Figure 3: Impression of soot-evolution and flame during burn test.*

Cyclic mechanical testing data

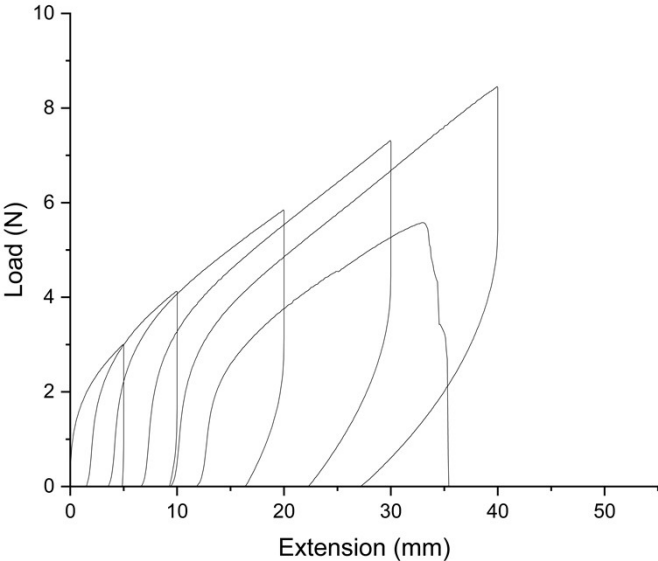

Figure 4: Curves of cyclic mechanical testing run.

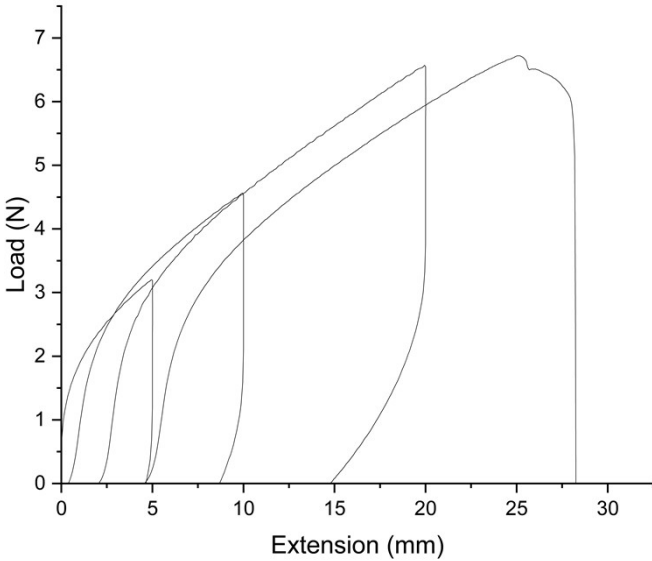

Figure 5: Curves of cyclic mechanical testing run.

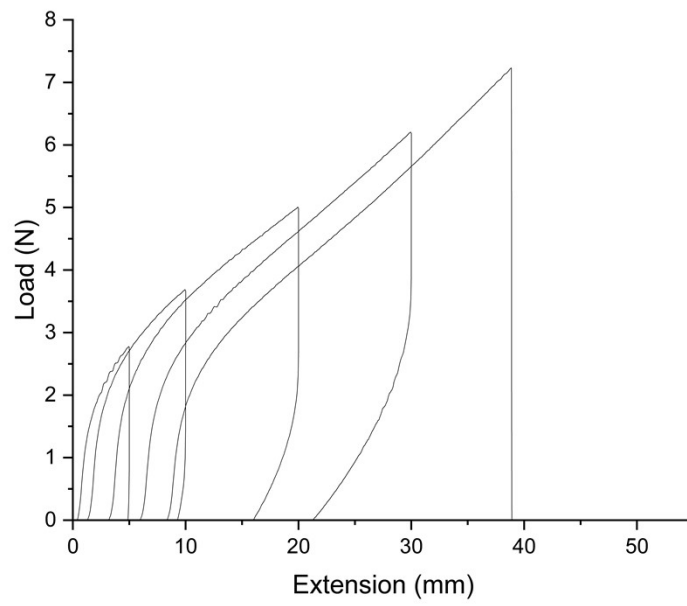

Figure 6: Curves of cyclic mechanical testing run.

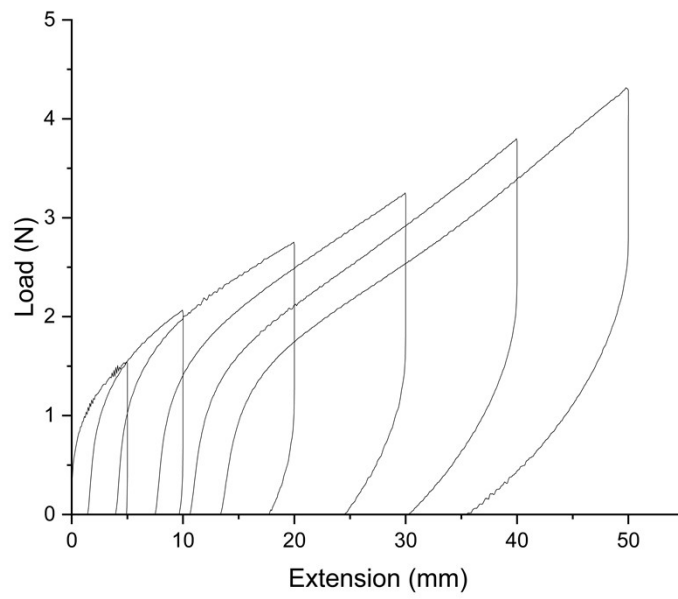

Figure 7: Curves of cyclic mechanical testing run.

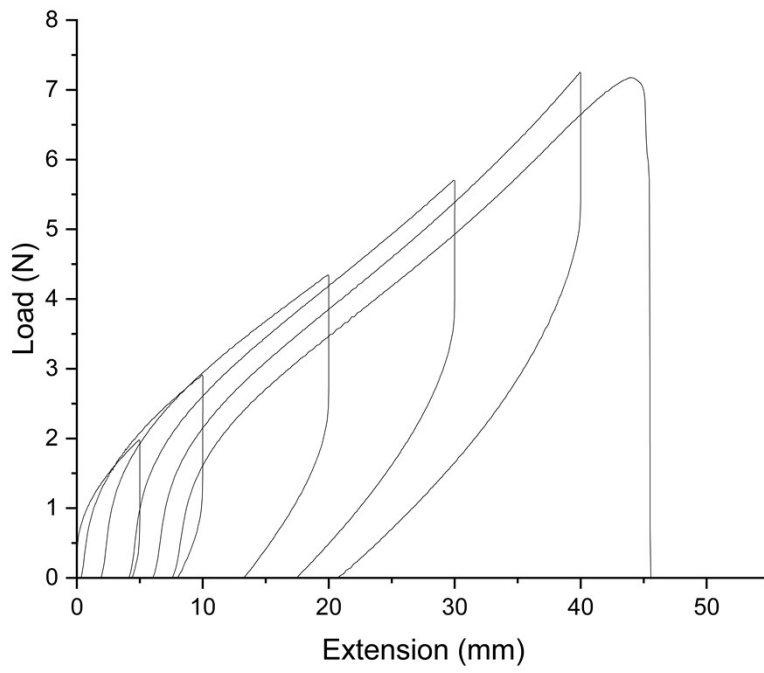

Figure 8: Curves of cyclic mechanical testing run.

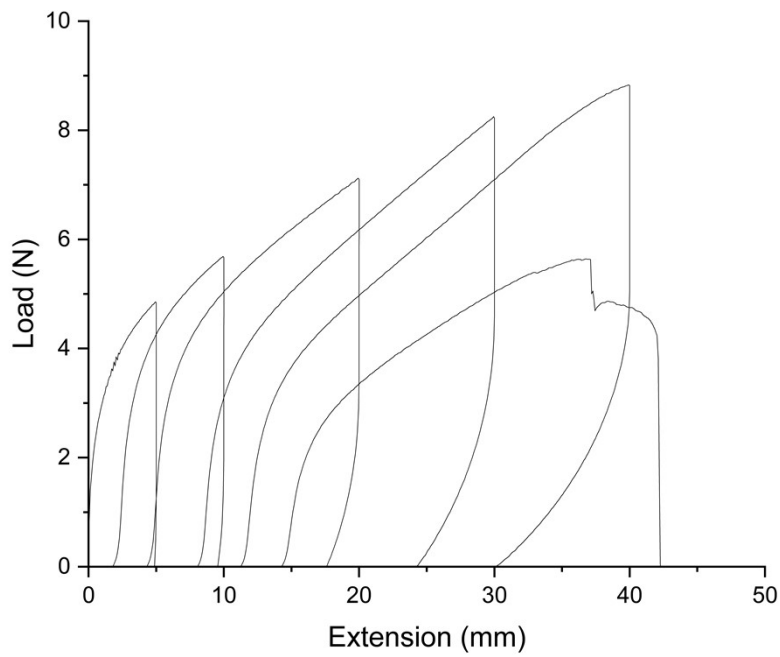

Figure 9: Curves of cyclic mechanical testing run.

Samples used for Shore tests

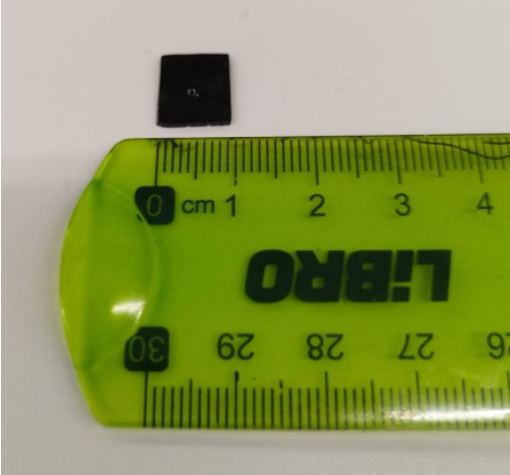

Figure 10: Typical sample used for shore hardness tests.

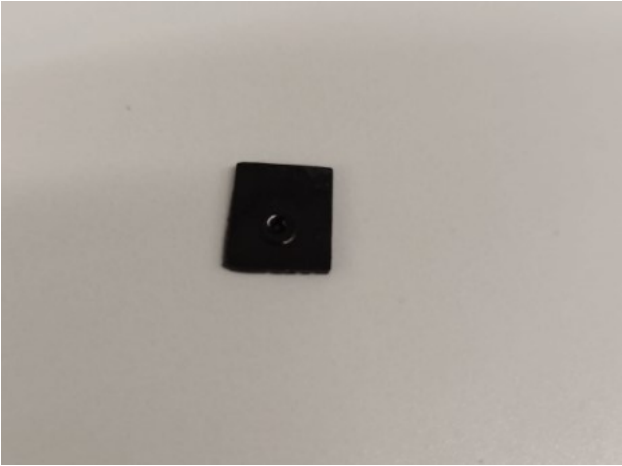

Figure 11: Sample immediately after shore hardness test.

## FT-IR spectrum of recovered hemicellulose

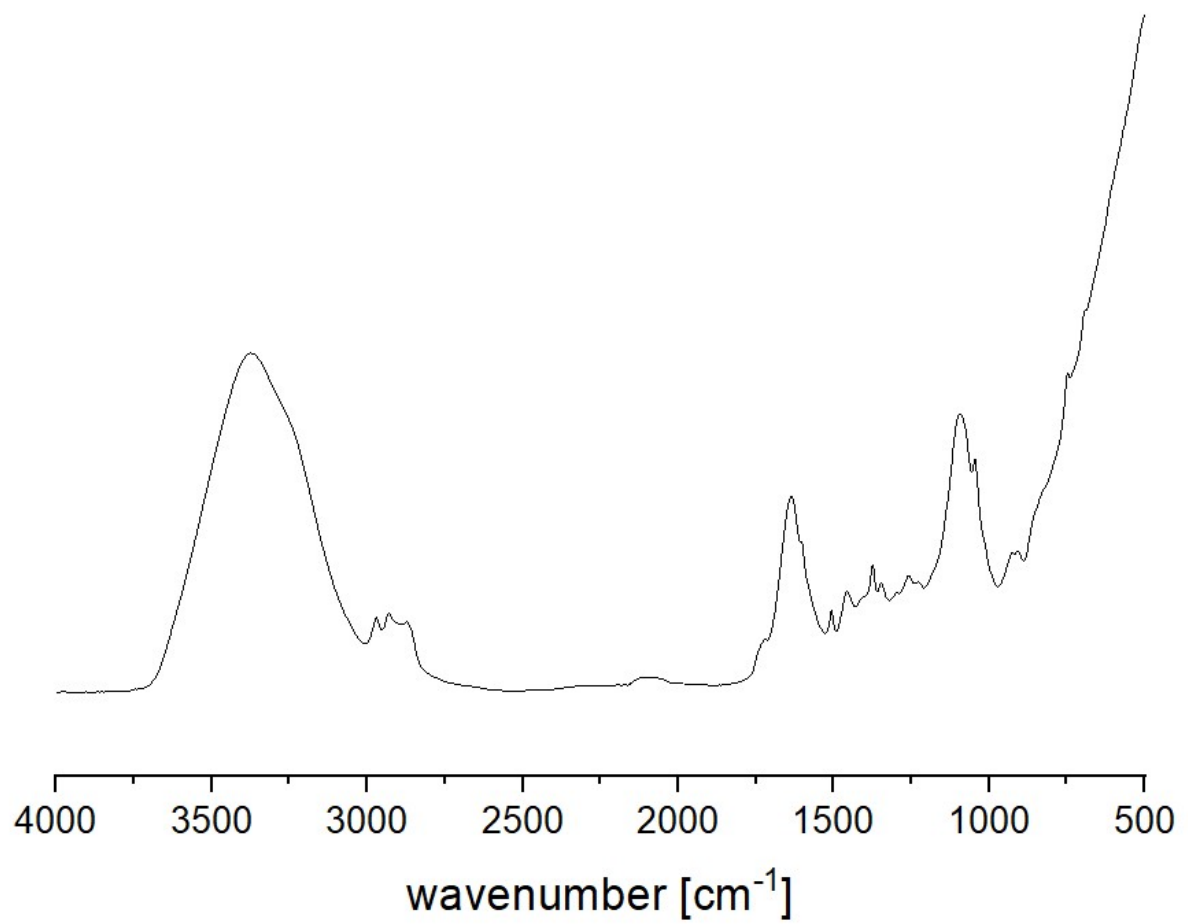

*Figure 12: Infrared spectrum of dry hemicellulose recovered by acetone precipitation.*
